# Supplementary material for: An injectablein situlipid phase transition system for sustained delivery of dabigatran etexilate with low burst release
Source: Royal Society of Chemistry journal article supplement (doi:10.1039/c7ra10375a), 2017-01-01
Supplement: c7ra10375a1.pdf [file c7ra10375a1.pdf]

Electronic Supporting Information to

## An injectable *in situ* lipid phase transition system for sustained delivery of dabigatran etexilate with low burst release

Xuanmiao Zhang <sup>a,b</sup>, Mei Hu <sup>c</sup>, Guangfei Wei <sup>c</sup>, Mengdi Jia <sup>c</sup>, Tao Gong <sup>c</sup>, Ji Liu <sup>a</sup>

### Cytotoxicity assay

The cell counting kit-8 assay was used to evaluate the cytotoxicity of DABE-LPTS. Initially, 0.5 mL of DABE-LPTS was added to 5 mL of RPMI-1640 culture media with 10% fetal bovine serum, and incubated at 37 °C for 12 h. After centrifugation, the supernatant of the mixture was taken for a medium extract which was diluted serially using RPMI-1640 with 10% fetal bovine serum to achieve the final concentrations of 1.25, 2.5, 5, 10 and 20%.

L929 cells were seeded in 96-well plates at  $4 \times 10^4$  cells/well and incubated for 24 h. Cells were then treated with diluted medium extracts for 24 h. Afterward, 10  $\mu$ L of CCK-8 solution was added into each well and cells were incubated for another 1 h at 37 °C. The absorbance was measured by a microplate reader at 450 nm. Cell viability (%) was calculated according to the following equation:  $(A_{\text{test}}/A_{\text{control}}) \times 100\%$ , where  $A_{\text{test}}$  and  $A_{\text{control}}$  represent the absorbance of cells treated with diluted medium extract and blank culture media, respectively.

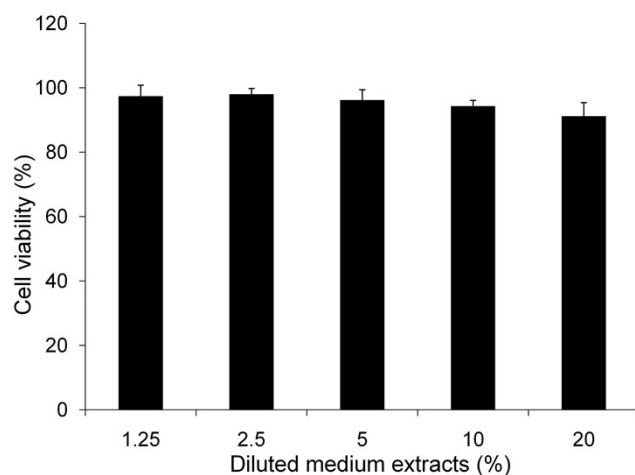

Fig.S1. Cytotoxicity profile of L929 cells cultured with the medium extracts of DABE-LPTS. Cells without exposure to samples were used as control. Data represent mean  $\pm$  SD (n = 6).

### References

1. H. Li, T. Liu, Y. Zhu, Q. Fu, W. Wu, J. Deng, L. Lan, S. Shi. *Acta Biomaterialia* 2017;**58**:136-145.
